# Supplementary material for: 3D hierarchical nanoarrays composed of NiCo–Te multilayer nanoneedles modified with Co1.29Ni1.71O4 for high-performance hybrid supercapacitors
Source: Royal Society of Chemistry journal article supplement (doi:10.1039/d1nj04260b), 2021-01-01
Supplement: d1nj04260b1.pdf [file d1nj04260b1.pdf]

## Supporting information

### **3D hierarchical nanoarrays composed of NiCo-Te multilayer nanoneedles modified with $\text{Co}_{1.29}\text{Ni}_{1.71}\text{O}_4$ for high-performance hybrid supercapacitors**

Chao Shi <sup>a, b</sup>, Qingjun Yang <sup>b</sup>, Chengyu Deng <sup>b</sup>, Shengyu Chen <sup>b</sup>, Yue Hao <sup>a</sup>, Yongsheng Yan <sup>a, b, \*</sup>,  
Maobin Wei <sup>a, \*</sup>

<sup>a</sup> *Key Laboratory of Functional Material Physics and Chemistry of the Ministry of Education, Jilin  
Normal University, Changchun, 130103, P.R. China*

<sup>b</sup> *School of Chemistry and Chemical Engineering, Jiangsu University, Zhenjiang, 212013, P. R.  
China.*

*\* Corresponding Author E-mail Address:*

yys@mail.ujs.edu.cn; jlsdzccw@126.com

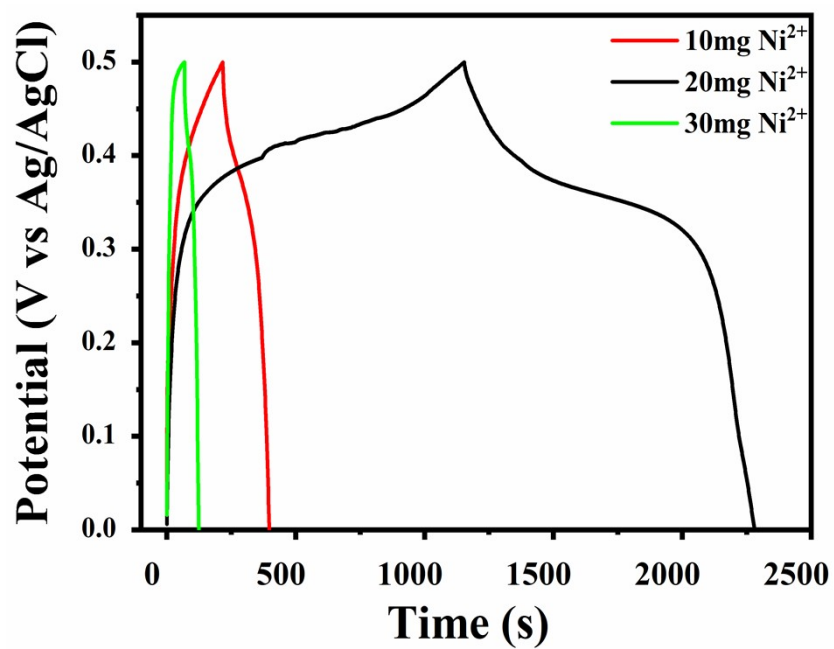

Fig.S1. GCD curves at 1 A g<sup>-1</sup> of the electrodes with different doses of nickel sources.

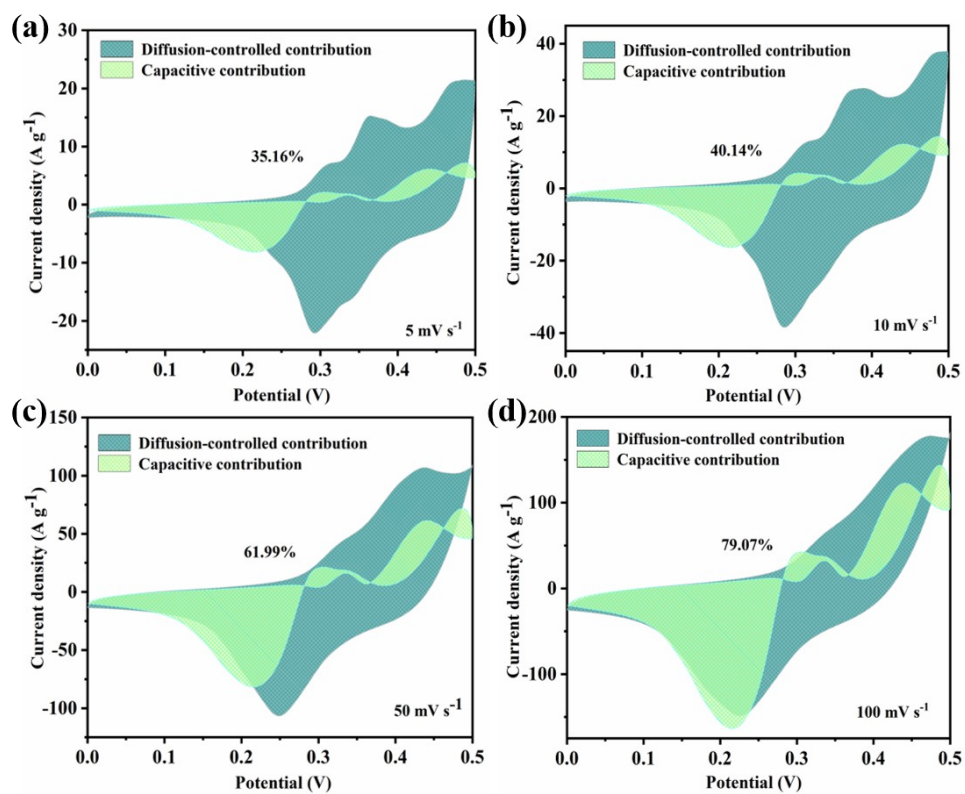

**Fig.S2.** Capacitive and diffusion-controlled contributions of NF@NiCo-Te/Co<sub>1.29</sub>Ni<sub>1.71</sub>O<sub>4</sub> electrode at various current density.

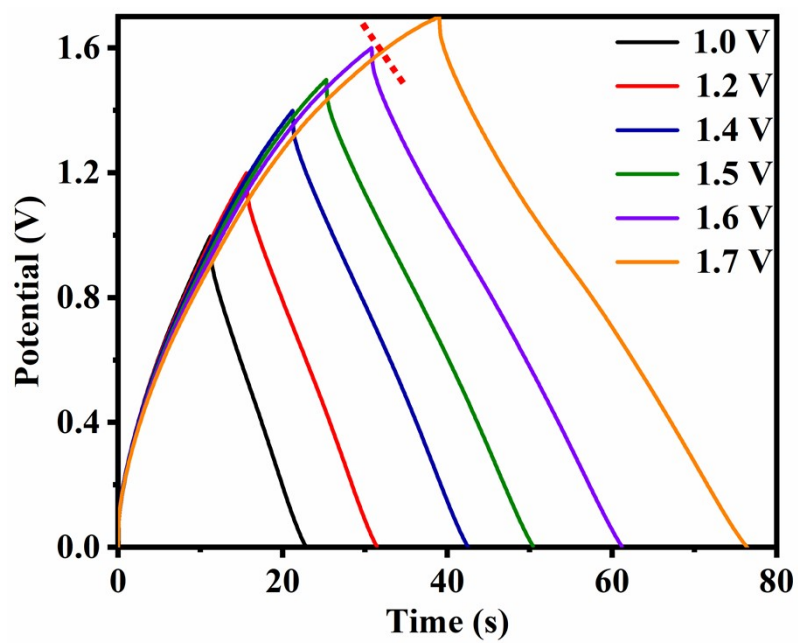

Fig.S3. GCD curves of prepared device with various voltage windows
